# Supplementary material for: Detection and quantification protocols for investigating the early stages of Botrytis cinerea interaction with strawberry reveal different infection strategies
Source: Research Square preprint supplement (doi:10.21203/rs.3.rs-5883923/v1), 2025-04-14
Supplement: Supplementary file 1 [file 21d7d340c62a257761957f53.xlsx]

## Sheet: 3-7-24 - infected petal time co
Sample	Target	Cq IGS	Av Cq of 4 tech reps	Av Cq of 3 bioreps	SD of 3 bioreps Av Cq IGS	Quantity (ng)	Average quantity of 4 tech reps	Av quantity of 3 bioreps IGS (ng)	SD of 3 bioreps quantity (ng) IGS	Sample	Target	Cq ACTIN	Av Cq of 4 tech reps ACTIN	Av Quantity of 3 bioreps ACTIN	SD of 3 bioreps Av quantity ACTIN	Quantity (ng)	Average amount of 4 tech reps	Av amount of 3 bioreps ACTIN (ng)	SD Amount (ng) Actin	Normalized amount of Bc DNA (ng)
0 hpi - 1	SYBER - IGS	30.8857	30.9028	30.5447	0.868343	0.0100854	0.0099842	0.0143646	0.00802718	0 hpi - 1	SYBR - ACTIN	28.5877	28.1175	26.5175	1.49253	0.040653	0.0578879	0.222244	0.178696	0.172475
0 hpi - 1	SYBER - IGS	30.8779				0.0101353				0 hpi - 1	SYBR - ACTIN	28.2005				0.0528197
0 hpi - 1	SYBER - IGS	31.005				0.00935243				0 hpi - 1	SYBR - ACTIN	27.5117				0.0841571
0 hpi - 1	SYBER - IGS	30.8426				0.0103637				0 hpi - 1	SYBR - ACTIN	28.17				0.0539216
0 hpi - 2	SYBER - IGS	30.9716	31.1768			0.009552	0.00948062			0 hpi - 2	SYBR - ACTIN	26.4031	26.2722			0.178095	0.196383			0.0482761
0 hpi - 2	SYBER - IGS	30.7358				0.0110877				0 hpi - 2	SYBR - ACTIN	26.5332				0.163093
0 hpi - 2	SYBER - IGS	30.3757				0.0139234				0 hpi - 2	SYBR - ACTIN	26.1015				0.218385
0 hpi - 2	SYBER - IGS	32.624				0.00335939				0 hpi - 2	SYBR - ACTIN	26.051				0.22596
0 hpi - 3	SYBER - IGS	29.3207	29.5546			0.0271344	0.0236291			0 hpi - 3	SYBR - ACTIN	25.2526	25.1628			0.387722	0.412461			0.0572879
0 hpi - 3	SYBER - IGS	29.7823				0.0202636				0 hpi - 3	SYBR - ACTIN	25.1187				0.424448
0 hpi - 3	SYBER - IGS	29.3498				0.0266392				0 hpi - 3	SYBR - ACTIN	25.2076				0.399687
0 hpi - 3	SYBER - IGS	29.7656				0.020479				0 hpi - 3	SYBR - ACTIN	25.0723				0.437989
1/10 - IGS	SYBER - IGS	21.9544	22.4551			1.87	1.87			1/10 - ACTIN	SYBR - ACTIN	22.8248	22.7297			1.485	1.485			1.25926
1/10 - IGS	SYBER - IGS	22.6235				1.87				1/10 - ACTIN	SYBR - ACTIN	22.2499				1.485
1/10 - IGS	SYBER - IGS	22.5708				1.87				1/10 - ACTIN	SYBR - ACTIN	22.9991				1.485
1/10 - IGS	SYBER - IGS	22.6716				1.87				1/10 - ACTIN	SYBR - ACTIN	22.8451				1.485
1/100 - IGS	SYBER - IGS	26.2525	26.2193			0.187	0.187			1/100 - ACTIN	SYBR - ACTIN	26.2074	26.4032			0.1485	0.1485			1.25926
1/100 - IGS	SYBER - IGS	26.0743				0.187				1/100 - ACTIN	SYBR - ACTIN	26.4726				0.1485
1/100 - IGS	SYBER - IGS	26.1632				0.187				1/100 - ACTIN	SYBR - ACTIN	26.7694				0.1485
1/100 - IGS	SYBER - IGS	26.387				0.187				1/100 - ACTIN	SYBR - ACTIN	26.1634				0.1485
1/1000 - IGS	SYBER - IGS	29.7274	29.8112			0.0187	0.0187			1/1000 - ACTIN	SYBR - ACTIN	29.754	29.8988			0.01485	0.01485			1.25926
1/1000 - IGS	SYBER - IGS	29.7624				0.0187				1/1000 - ACTIN	SYBR - ACTIN	29.779				0.01485
1/1000 - IGS	SYBER - IGS	29.6822				0.0187				1/1000 - ACTIN	SYBR - ACTIN	29.9584				0.01485
1/1000 - IGS	SYBER - IGS	30.073				0.0187				1/1000 - ACTIN	SYBR - ACTIN	30.1036				0.01485
1/10000 - IGS	SYBER - IGS	33.5756	33.6915			0.00187	0.00187			1/10000 - ACTIN	SYBR - ACTIN	33.9885	34.0186			0.001485	0.001485			1.25926
1/10000 - IGS	SYBER - IGS	33.7087				0.00187				1/10000 - ACTIN	SYBR - ACTIN	34.8118				0.001485
1/10000 - IGS	SYBER - IGS	33.5296				0.00187				1/10000 - ACTIN	SYBR - ACTIN	33.2556				0.001485
1/10000 - IGS	SYBER - IGS	33.9521				0.00187				1/10000 - ACTIN	SYBR - ACTIN	Undetermined				0.001485
16 hpi - 1	SYBER - IGS	35.1443	34.5411	34.0989	0.517467	0.000682442	0.00114406	0.00150197	0.000458447	16 hpi - 1	SYBR - ACTIN	26.8983	27.0994	25.6466	1.29001	0.127416	0.111766	0.369637	0.243636	0.0102363
16 hpi - 1	SYBER - IGS	33.2491				0.00226247				16 hpi - 1	SYBR - ACTIN	27.2502				0.100431
16 hpi - 1	SYBER - IGS	34.6136				0.000954557				16 hpi - 1	SYBR - ACTIN	27.0217				0.117211
16 hpi - 1	SYBER - IGS	35.1574				0.000676781				16 hpi - 1	SYBR - ACTIN	27.2272				0.102005
16 hpi - 2	SYBER - IGS	35.2121	34.2259			0.00065377	0.00134314			16 hpi - 2	SYBR - ACTIN	25.2635	25.205			0.384864	0.40118			0.00334797
16 hpi - 2	SYBER - IGS	33.6622				0.00174225				16 hpi - 2	SYBR - ACTIN	25.2817				0.380168
16 hpi - 2	SYBER - IGS	34.5921				0.000967678				16 hpi - 2	SYBR - ACTIN	25.223				0.395546
16 hpi - 2	SYBER - IGS	33.4371				0.00200885				16 hpi - 2	SYBR - ACTIN	25.0517				0.444141
16 hpi - 3	SYBER - IGS	34.5251	33.5298			0.00100951	0.00201871			16 hpi - 3	SYBR - ACTIN	24.7537	24.6354			0.543282	0.595964			0.0033873
16 hpi - 3	SYBER - IGS	33.4375				0.00200832				16 hpi - 3	SYBR - ACTIN	24.655				0.580784
16 hpi - 3	SYBER - IGS	33.2043				0.00232746				16 hpi - 3	SYBR - ACTIN	24.8724				0.501378
16 hpi - 3	SYBER - IGS	32.9523				0.00272956				16 hpi - 3	SYBR - ACTIN	24.2603				0.758414
24 hpi - 1	SYBER - IGS	24.4989	22.9082	25.0505	2.33643	0.572537	0.872894	0.494144	0.395502	24 hpi - 1	SYBR - ACTIN	21.1697	20.8689	21.2175	0.694225	6.13119	7.59094	6.3823	2.53211	0.114991
24 hpi - 1	SYBER - IGS	24.3311				0.636669				24 hpi - 1	SYBR - ACTIN	20.9419				7.15215
24 hpi - 1	SYBER - IGS	19.7286				Undetermined				24 hpi - 1	SYBR - ACTIN	20.766				8.05559
24 hpi - 1	SYBER - IGS	23.0744				1.40947				24 hpi - 1	SYBR - ACTIN	20.5979				9.02484
24 hpi - 2	SYBER - IGS	27.4027	27.5418			0.0912629	0.0837865			24 hpi - 2	SYBR - ACTIN	22.0095	22.017			3.47468	3.47234			0.0241297
24 hpi - 2	SYBER - IGS	27.7045				0.0754064				24 hpi - 2	SYBR - ACTIN	22.2451				2.96285
24 hpi - 2	SYBER - IGS	27.58				0.081583				24 hpi - 2	SYBR - ACTIN	21.9433				3.63362
24 hpi - 2	SYBER - IGS	27.4802				0.0868936				24 hpi - 2	SYBR - ACTIN	21.8701				3.8182
24 hpi - 3	SYBER - IGS	25.5385	24.7016			0.296687	0.525753			24 hpi - 3	SYBR - ACTIN	20.6563	20.7668			8.67546	8.08361			0.0650394
24 hpi - 3	SYBER - IGS	24.3405				0.632878				24 hpi - 3	SYBR - ACTIN	20.7585				8.09655
24 hpi - 3	SYBER - IGS	24.5674				0.548282				24 hpi - 3	SYBR - ACTIN	20.9892				6.92674
24 hpi - 3	SYBER - IGS	24.3599				0.625166				24 hpi - 3	SYBR - ACTIN	20.6631				8.63568
40 hpi - 1	SYBER - IGS	23.7285	23.395	23.984	1.38655	0.932001	1.16157	1.01294	0.659529	40 hpi - 1	SYBR - ACTIN	23.024	22.8776	23.3618	1.78612	1.74974	1.93653	2.04536	1.73609	0.599817
40 hpi - 1	SYBER - IGS	23.4486				1.11247				40 hpi - 1	SYBR - ACTIN	22.7405				2.1195
40 hpi - 1	SYBER - IGS	23.1665				1.3297				40 hpi - 1	SYBR - ACTIN	22.9031				1.89881
40 hpi - 1	SYBER - IGS	23.2365				1.27209				40 hpi - 1	SYBR - ACTIN	22.8426				1.97808
40 hpi - 2	SYBER - IGS	25.7224	25.5678			0.2641	0.291776			40 hpi - 2	SYBR - ACTIN	25.2098	25.3401			0.399086	0.366241			0.796677
40 hpi - 2	SYBER - IGS	25.5485				0.294818				40 hpi - 2	SYBR - ACTIN	25.3258				0.368978
40 hpi - 2	SYBER - IGS	25.5493				0.294653				40 hpi - 2	SYBR - ACTIN	25.3397				0.365528
40 hpi - 2	SYBER - IGS	25.4511				0.313532				40 hpi - 2	SYBR - ACTIN	25.4848				0.331372
40 hpi - 3	SYBER - IGS	23.4423	22.9892			1.11691	1.58547			40 hpi - 3	SYBR - ACTIN	22.0139	21.8677			3.46436	3.8333			0.413604
40 hpi - 3	SYBER - IGS	23.6536				0.977178				40 hpi - 3	SYBR - ACTIN	21.9097				3.71713
40 hpi - 3	SYBER - IGS	22.5496				1.96427				40 hpi - 3	SYBR - ACTIN	21.7824				4.0513
40 hpi - 3	SYBER - IGS	22.3114				2.28352				40 hpi - 3	SYBR - ACTIN	21.7646				4.10042
Neat IGS	SYBER - IGS	19.3016	19.1646			18.7	18.7			Neat ACTIN	SYBR - ACTIN	20.0035	20.4429			14.85	14.85			1.25926
Neat IGS	SYBER - IGS	18.9129				18.7				Neat ACTIN	SYBR - ACTIN	20.7438				14.85
Neat IGS	SYBER - IGS	19.1117				18.7				Neat ACTIN	SYBR - ACTIN	20.7698				14.85
Neat IGS	SYBER - IGS	19.3322				18.7				Neat ACTIN	SYBR - ACTIN	20.2546				14.85
